# Supplementary material
Source: publisher figshare collection journal article supplement (https://tandf.figshare.com/ndownloader/files/17938805)
Supplement: Supplementary file 1 [file 17938805]

**Supplementary Information 1**

Genbank Accession numbers of *Antidesma spp*. and *Thecacoris sp.* utilized in the SRM Herbal Barcode Library

| **Species** | **Genbank Accession Numbers** | | |
| --- | --- | --- | --- |
| ***mat*K** | ***psb*A-*trn*H** | ***rbc*L** |
| *Thecacoris sp.* (Outgroup) | KC627794.1 | KC667605.1 | KC628465.1 |
| *A. bunius* (L.) Spreng. | KR530362.1 | KP095656.1 | KR528724.1 |
| KR530361.1 | KP095655.1 | KR528723.1 |
| KR530363.1 | HQ415553.1 | KR528722.1 |
| *A. ghaesembilla* Gaertn. | AB924821.1 | - | AB925432.1 |
| *A. japonicum* Siebold & Zucc*.* | AB925078.1 | KR534113.1 | AB925707.1 |
| AB924893.1 | KR534112.1 | AB925514.1 |
| *A. montanum* Blume | KR530364.1 | KR534110.1 | AB925849.1 |
| AB925218.1 | KR534109.1 | AB925832.1 |
| *A. puncticulatum* Miq. | AB925224.1 | - | AB925855.1 |
| AB925096.1 | - | AB925725.1 |
| AB925013.1 | - | - |
| *A. venosum* E.Mey. ex Tul. | HQ415372.1 | KP095660.1 | KP094722.1 |
| KP093786.1 | KP095659.1 | JX572307.1 |
